# Supplementary material for: Good Performance of Revised Scoring Systems in Predicting Clinical Outcomes of Aeromonas Bacteremia in the Emergency Department: A Retrospective Observational Study
Source: MDPI journal article supplement (doi:10.3390/diagnostics14020124), 2024-01-05
Supplement: s1 [file s1]

Table S1: Scoring systems

Mortality in emergency department sepsis (MEDS) score [43]

| Mortality in emergency department sepsis (MEDS) score | Points |
|-------------------------------------------------------|--------|
| 1. Terminal illness with possible death in 1 month    | 6      |
| 2. Hypoxia or tachypnea                               | 3      |
| 3. Shock from sepsis                                  | 3      |
| 4. Platelet count below 150,000                       | 3      |
| 5. Granulocytic bands >5% of white blood cells        | 3      |
| 6. Patient older than 65 years old                    | 3      |
| 7. Lower respiratory infection                        | 2      |
| 8. Patient is from a nursing home                     | 2      |
| 9. Mental status is altered                           | 2      |

Modified Early Warning Score [46]

| Points                         | 3          | 2          | 1      | 0         | 1       | 2              | 3             |
|--------------------------------|------------|------------|--------|-----------|---------|----------------|---------------|
| Temperature (°C)               |            | 35 or less |        | 35.1–38.4 |         | 38.5 or higher |               |
| Heart rate (bpm)               |            | 39 or less | 40–50  | 51–100    | 101–110 | 111–129        | 130 or higher |
| Systolic blood pressure (mmHg) | 70 or less | 71–80      | 81–100 | 101–199   |         | 200 or higher  |               |
| Respiratory rate               |            | 8 or less  | 9      | 10–18     | 19–20   | 21–29          | 30 or higher  |
| AVPU score                     |            |            |        | A         | V       | P              | U             |

National Early Warning Score [41]

| Physiological parameters              | 3     | 2      | 1         | 0         | 1         | 2       | 3         |
|---------------------------------------|-------|--------|-----------|-----------|-----------|---------|-----------|
| Respiration Rate (breaths per minute) | ≤8    |        | 9–11      | 12–20     |           | 21–24   | ≥25       |
| SpO2 (%)                              | ≤91   | 92–93  | 94–95     | ≥96       |           |         |           |
| Any supplemental oxygen?              |       | Yes    |           | No        |           |         |           |
| Temperature (°C)                      | ≤35.0 |        | 35.1–36.0 | 36.1–38.0 | 38.1–39.0 | ≥39.1   |           |
| Systolic BP (mmHg)                    | ≤90   | 91–100 | 101–110   | 111–219   |           |         | ≥220      |
| Heart/pulse rate (beats per minute)   | ≤40   |        | 41–50     | 51–90     | 91–110    | 111–130 | ≥131      |
| Level of consciousness (AVPU system)  |       |        |           | A         |           |         | V, P or U |

Rapid Acute Physiology Score [47]

| Variable   | 0      | +1             | +2               | +3               | +4          |
|------------|--------|----------------|------------------|------------------|-------------|
| PR (/min)  | 70–109 |                | 55–69<br>110–139 | 40–54<br>140–179 | ≤39<br>≥180 |
| MAP (mmHg) | 70–109 |                | 50–69<br>110–129 | 130–159          | ≤49<br>≥160 |
| RR (/min)  | 12–24  | 10–11<br>25–34 | 6–9              | 35–49            | ≤5<br>≥50   |
| GCS        | ≥14    | 11–13          | 8–10             | 5–7              | ≤4          |

# Rapid Emergency Medicine Score [48]

| REMS scoring system            | Score    |                |                  |                  |             |       |     |
|--------------------------------|----------|----------------|------------------|------------------|-------------|-------|-----|
| <i>Variable</i>                | 0        | +1             | +2               | +3               | +4          | +5    | +6  |
| Age (years)                    | <45      |                | 45–54            | 55–64            |             | 65–74 | >74 |
| Mean arterial pressure (mmHg)  | 70–109   |                | 110–129<br>50–69 | 130–159          | >159<br>≤49 |       |     |
| Heart rate (bpm)               | 70–109   |                | 110–139<br>55–69 | 140–179<br>40–54 | >179<br>≤39 |       |     |
| Respiratory rate (breaths/min) | 12–24    | 25–34<br>10–11 | 6–9              | 35–49            | >49<br>≤5   |       |     |
| O <sub>2</sub> saturation (%)  | >89      | 86–89          |                  | 75–85            | <75         |       |     |
| Glasgow Coma Scale             | 14 or 15 | 11–13          | 8–10             | 5–7              | 3 or 4      |       |     |

quick Sequential Organ Failure Score [49]

|                               | Point |
|-------------------------------|-------|
| Respiratory Rate > 22         | 1     |
| Systolic Blood Pressure < 100 | 1     |
| Glasgow Coma Scale <14        | 1     |
